# Supplementary material for: First Report of Bartonella spp. in Marsupials from Brazil, with a Description of Bartonella harrusi sp. nov. and a New Proposal for the Taxonomic Reclassification of Species of the Genus Bartonella
Source: MDPI journal article supplement (doi:10.3390/microorganisms10081609), 2022-08-09
Supplement: s1 [file s1]

**Table S1.** Taxonomic reclassification of the *Bartonella* species based on the 95% cut-off point assessed by the Average Nucleotide Identity (ANI) value. *Bartonella* species with a new proposed taxonomic status are red-marked. n/a: species that did not have ANI variation below the 97% cut-off.

| Species on Genbank                      | Strain          | Accession number   | Lineage (based Subcluste |                      | New proposed classification                                     |
|-----------------------------------------|-----------------|--------------------|--------------------------|----------------------|-----------------------------------------------------------------|
|                                         |                 |                    | on cut off<br>= 95% )    | r (cut off<br>= 97%) |                                                                 |
| <i>Bartonella bovis</i>                 | CIP 106692      | CACVBI010000001    | 1                        | subsp. 1             | <i>Bartonella bovis</i> subsp. 1                                |
| <i>Bartonella bovis</i>                 | 91-4            | CM001844           | 1                        | subsp. 1             | <i>Bartonella bovis</i> subsp. 1                                |
| <i>Bartonella bovis</i>                 | BbUM            | MWVG010000001      | 1                        | subsp. 2             | <i>Bartonella bovis</i> subsp. 2                                |
| <i>Bartonella bovis</i>                 | m02             | KB915624           | 1                        | subsp. 3             | <i>Bartonella bovis</i> subsp. 3                                |
| <i>Bartonella</i> sp.                   | WD12.1          | MUBG010000001      | 2                        | n/a                  | <i>Bartonella</i> sp. nov. lineage 2                            |
| <i>Bartonella schoenbuchensis</i>       | CCUG 50783      | CADDYD010000001    | 3                        | subsp. 1             | <i>Bartonella schoenbuchensis</i> subsp. <i>schoenbuchensis</i> |
| <i>Bartonella schoenbuchensis</i>       | R1              | CP019789           | 3                        | subsp. 1             | <i>Bartonella schoenbuchensis</i> subsp. <i>schoenbuchensis</i> |
| <i>Bartonella schoenbuchensis</i>       | m07a            | KB915627           | 3                        | subsp. 1             | <i>Bartonella schoenbuchensis</i> subsp. <i>schoenbuchensis</i> |
| <i>Bartonella chomelii</i>              | DSM 21431       | NZ_JACJIR010000001 | 3                        | subsp. 1             | <i>Bartonella schoenbuchensis</i> subsp. <i>schoenbuchensis</i> |
| <i>Bartonella capreoli</i>              | DSM 21569       | CADDZX010000001    | 3                        | subsp. 2             | <i>Bartonella schoenbuchensis</i> subsp. <i>capreoli</i>        |
| <i>Bartonella melophagi</i>             | K-2C            | JH725081           | 3                        | subsp. 3             | <i>Bartonella melophagi</i> subsp. <i>melophagi</i>             |
| <i>Bartonella</i> sp.                   | WD16.2          | CP019781           | 4                        | n/a                  | <i>Bartonella</i> sp. nov. lineage 4                            |
| <i>Bartonella bacilliformis</i>         | USM-LMMB        | LQWW010000001      | 5                        | subsp. 1             | <i>Bartonella bacilliformis</i> subsp. 1                        |
| <i>Bartonella bacilliformis</i>         | USM-LMMB        | LQXX010000001      | 5                        | subsp. 1             | <i>Bartonella bacilliformis</i> subsp. 1                        |
| <i>Bartonella bacilliformis</i>         | ATCC 35685D-5   | CP014012           | 5                        | subsp. 1             | <i>Bartonella bacilliformis</i> subsp. 1                        |
| <i>Bartonella bacilliformis</i>         | INS             | AMQK010000001      | 5                        | subsp. 1             | <i>Bartonella bacilliformis</i> subsp. 1                        |
| <i>Bartonella bacilliformis</i>         | KC583           | CP000524           | 5                        | subsp. 1             | <i>Bartonella bacilliformis</i> subsp. 1                        |
| <i>Bartonella bacilliformis</i>         | Ver075          | KL503822           | 5                        | subsp. 1             | <i>Bartonella bacilliformis</i> subsp. 1                        |
| <i>Bartonella bacilliformis</i>         | CAR600-02       | KL503826           | 5                        | subsp. 1             | <i>Bartonella bacilliformis</i> subsp. 1                        |
| <i>Bartonella bacilliformis</i>         | VAB9028         | KL503815           | 5                        | subsp. 1             | <i>Bartonella bacilliformis</i> subsp. 1                        |
| <i>Bartonella bacilliformis</i>         | CUSCO5          | KL503795           | 5                        | subsp. 1             | <i>Bartonella bacilliformis</i> subsp. 1                        |
| <i>Bartonella bacilliformis</i>         | Cond044         | KL503799           | 5                        | subsp. 1             | <i>Bartonella bacilliformis</i> subsp. 1                        |
| <i>Bartonella bacilliformis</i>         | Peru38          | KL503808           | 5                        | subsp. 1             | <i>Bartonella bacilliformis</i> subsp. 1                        |
| <i>Bartonella bacilliformis</i>         | Hosp800-02      | KL503779           | 5                        | subsp. 1             | <i>Bartonella bacilliformis</i> subsp. 1                        |
| <i>Bartonella bacilliformis</i>         | Heidi           | KK097685           | 5                        | subsp. 1             | <i>Bartonella bacilliformis</i> subsp. 1                        |
| <i>Bartonella bacilliformis</i>         | San Pedro600-02 | KK097680           | 5                        | subsp. 1             | <i>Bartonella bacilliformis</i> subsp. 1                        |
| <i>Bartonella bacilliformis</i>         | Peru-18         | KK097689           | 5                        | subsp. 1             | <i>Bartonella bacilliformis</i> subsp. 1                        |
| <i>Bartonella bacilliformis</i>         | Ver097          | KL503802           | 5                        | subsp. 2             | <i>Bartonella bacilliformis</i> subsp. 2                        |
| <i>Bartonella australis</i>             | Aust/NH1        | CP003123           | 6                        | n/a                  | <i>Bartonella australis</i>                                     |
| <i>Bartonella elizabethae</i>           | NCTC12898       | LR134527           | 7                        | subsp. 1             | <i>Bartonella elizabethae</i> subsp. 1                          |
| <i>Bartonella elizabethae</i>           | BeUM            | LFMF010000001      | 7                        | subsp. 1             | <i>Bartonella elizabethae</i> subsp. 1                          |
| <i>Bartonella elizabethae</i>           | F9251 = ATCC    | JADB010000001      | 7                        | subsp. 1             | <i>Bartonella elizabethae</i> subsp. 1                          |
| <i>Bartonella elizabethae</i>           | F9251           | JH725033           | 7                        | subsp. 1             | <i>Bartonella elizabethae</i> subsp. 1                          |
| <i>Bartonella elizabethae</i>           | Re6043vi        | JH725139           | 7                        | subsp. 1             | <i>Bartonella elizabethae</i> subsp. 1                          |
| <i>Bartonella elizabethae</i>           | F9251 = ATCC    | CADEAC010000001    | 7                        | subsp. 1             | <i>Bartonella elizabethae</i> subsp. 1                          |
| <i>Bartonella</i> sp.                   | .008            | LT883127           | 7                        | subsp. 2             | <i>Bartonella elizabethae</i> subsp. 2                          |
| <i>Bartonella krasnovii</i>             | B60_6           | CP093035           | 8                        | subsp. 1             | <i>Bartonella krasnovii</i> subsp. 1                            |
| <i>Bartonella krasnovii</i>             | B84_4           | CP093038           | 8                        | subsp. 1             | <i>Bartonella krasnovii</i> subsp. 1                            |
| <i>Bartonella krasnovii</i>             | 84B_2           | CP093046           | 8                        | subsp. 1             | <i>Bartonella krasnovii</i> subsp. 1                            |
| <i>Bartonella krasnovii</i>             | 75A_1b          | CP093040           | 8                        | subsp. 1             | <i>Bartonella krasnovii</i> subsp. 1                            |
| <i>Bartonella krasnovii</i>             | 90B_7           | CP093044           | 8                        | subsp. 1             | <i>Bartonella krasnovii</i> subsp. 1                            |
| <i>Bartonella krasnovii</i>             | 51A_7           | CP093043           | 8                        | subsp. 1             | <i>Bartonella krasnovii</i> subsp. 1                            |
| <i>Bartonella krasnovii</i>             | B9_5            | CP093039           | 8                        | subsp. 1             | <i>Bartonella krasnovii</i> subsp. 1                            |
| <i>Bartonella krasnovii</i>             | 75A_4b          | CP093042           | 8                        | subsp. 1             | <i>Bartonella krasnovii</i> subsp. 1                            |
| <i>Bartonella krasnovii</i>             | 87B_3           | CP093041           | 8                        | subsp. 1             | <i>Bartonella krasnovii</i> subsp. 1                            |
| <i>Bartonella krasnovii</i>             | B1_2            | CP093037           | 8                        | subsp. 1             | <i>Bartonella krasnovii</i> subsp. 1                            |
| <i>Bartonella krasnovii</i>             | B71             | CP093034           | 8                        | subsp. 1             | <i>Bartonella krasnovii</i> subsp. 1                            |
| <i>Bartonella krasnovii</i>             | B35_1_2         | CP093033           | 8                        | subsp. 1             | <i>Bartonella krasnovii</i> subsp. 1                            |
| <i>Bartonella krasnovii</i>             | B51_4           | CP093036           | 8                        | subsp. 1             | <i>Bartonella krasnovii</i> subsp. 1                            |
| <i>Bartonella krasnovii</i>             | OE 1-1          | CP031844           | 8                        | subsp. 2             | <i>Bartonella krasnovii</i> subsp. 2                            |
| <i>Bartonella krasnovii</i>             | 36C_7b          | CP093045           | 8                        | subsp. 3             | <i>Bartonella krasnovii</i> subsp. 3                            |
| <i>Candidatus Bartonella sahelensis</i> | .077            | LR607310           | 9                        | n/a                  | <i>Bartonella sahelensis</i> sp. nov.                           |
| <i>Bartonella grahamii</i>              | ATCC 700132     | JACX010000001      | 10                       | subsp. 1             | <i>Bartonella grahamii</i> subsp. 1                             |

|                                     |                  |                  |    |          |                                            |
|-------------------------------------|------------------|------------------|----|----------|--------------------------------------------|
| <i>Bartonella grahamii</i>          | NCTC12860        | UFTD01000005     | 10 | subsp. 1 | <i>Bartonella grahamii</i> subsp. 1        |
| <i>Bartonella grahamii</i>          | as4aup           | CP001562         | 10 | subsp. 2 | <i>Bartonella grahamii</i> subsp. 2        |
| <i>Bartonella grahamii</i>          | A7JPB            | CACVBG010000001  | 10 | subsp. 3 | <i>Bartonella grahamii</i> subsp. 3        |
| <i>Bartonella grahamii</i>          | A1JPB            | CACVB010000001   | 10 | subsp. 4 | <i>Bartonella grahamii</i> subsp. 4        |
| <i>Bartonella tribocorum</i>        | L103             | CADDY010000001   | 11 | n/a      | <i>Bartonella</i> sp. nov. lineage 11      |
| <i>Bartonella tribocorum</i>        | L103             | NJGE010000001    | 11 | n/a      | <i>Bartonella</i> sp. nov. lineage 11      |
| <i>Bartonella tribocorum</i>        | CIP 105476       | AM260525         | 12 | n/a      | <i>Bartonella tribocorum</i>               |
| <i>Bartonella tribocorum</i>        | BM1374166        | CADDYK010000001  | 12 | n/a      | <i>Bartonella tribocorum</i>               |
| <i>Bartonella kosoyi</i>            | Tel Aviv         | CP031843         | 13 | n/a      | <i>Bartonella kosoyi</i>                   |
| <i>Bartonella tribocorum</i>        | C635             | NJPP010000001    | 14 | n/a      | <i>Bartonella</i> sp. nov. lineage 14      |
| <i>Bartonella tribocorum</i>        | C635             | CADDYJ010000001  | 14 | n/a      | <i>Bartonella</i> sp. nov. lineage 14      |
| <i>Bartonella queenslandensis</i>   | AUST/NH15        | HE997969         | 15 | subsp. 1 | <i>Bartonella queenslandensis</i> subsp. 1 |
| <i>Bartonella queenslandensis</i>   | BqUM             | NZ_NAAI010000001 | 15 | subsp. 2 | <i>Bartonella queenslandensis</i> subsp. 2 |
| <i>Bartonella massiliensis</i>      | OS09             | CABFVS010000001  | 16 | n/a      | <i>Bartonella massiliensis</i>             |
| <i>Bartonella rattimassiliensis</i> | 15908            | CALY02000093     | 17 | n/a      | <i>Bartonella rattimassiliensis</i>        |
| <i>Bartonella rattimassiliensis</i> | 15908            | JH725064         | 17 | n/a      | <i>Bartonella rattimassiliensis</i>        |
| <i>Bartonella fuyuanensis</i>       | DSM 100694       | JACIFE010000001  | 18 | n/a      | <i>Bartonella fuyuanensis</i>              |
| <i>Bartonella koehlerae</i>         | C-29             | KL407334         | 19 | n/a      | <i>Bartonella koehlerae</i>                |
| <i>Bartonella koehlerae</i>         | CCUG 50773       | CADEAH010000001  | 19 | n/a      | <i>Bartonella koehlerae</i>                |
| <i>Bartonella henselae</i>          | BM1374164        | CACVBL010000001  | 20 | n/a      | <i>Bartonella henselae</i>                 |
| <i>Bartonella henselae</i>          | BM1374163        | CACVBD010000001  | 20 | n/a      | <i>Bartonella henselae</i>                 |
| <i>Bartonella henselae</i>          | BM1374165        | CACVBK010000001  | 20 | n/a      | <i>Bartonella henselae</i>                 |
| <i>Bartonella henselae</i>          | ATCC49882T var-1 | CP072903         | 20 | n/a      | <i>Bartonella henselae</i>                 |
| <i>Bartonella henselae</i>          | ATCC49882T       | CP072902         | 20 | n/a      | <i>Bartonella henselae</i>                 |
| <i>Bartonella henselae</i>          | Marseille        | CP072904         | 20 | n/a      | <i>Bartonella henselae</i>                 |
| <i>Bartonella henselae</i>          | 88-64            | CP072899         | 20 | n/a      | <i>Bartonella henselae</i>                 |
| <i>Bartonella henselae</i>          | FR96/BK38        | CP072898         | 20 | n/a      | <i>Bartonella henselae</i>                 |
| <i>Bartonella henselae</i>          | G-5436           | CP072900         | 20 | n/a      | <i>Bartonella henselae</i>                 |
| <i>Bartonella henselae</i>          | FR96/BK3         | CP072897         | 20 | n/a      | <i>Bartonella henselae</i>                 |
| <i>Bartonella henselae</i>          | FDAARGOS_14 62   | CP082885         | 20 | n/a      | <i>Bartonella henselae</i>                 |
| <i>Bartonella henselae</i>          | Berlin-I         | CP072901         | 20 | n/a      | <i>Bartonella henselae</i>                 |
| <i>Bartonella henselae</i>          | 623-125          | BLJS010000001    | 20 | n/a      | <i>Bartonella henselae</i>                 |
| <i>Bartonella henselae</i>          | 804-29           | BLJT010000001    | 20 | n/a      | <i>Bartonella henselae</i>                 |
| <i>Bartonella henselae</i>          | Houston-I        | CP020742         | 20 | n/a      | <i>Bartonella henselae</i>                 |
| <i>Bartonella henselae</i>          | A242             | LOAF010000001    | 20 | n/a      | <i>Bartonella henselae</i>                 |
| <i>Bartonella henselae</i>          | A121             | LOAC010000001    | 20 | n/a      | <i>Bartonella henselae</i>                 |
| <i>Bartonella henselae</i>          | F1               | LOAI010000001    | 20 | n/a      | <i>Bartonella henselae</i>                 |
| <i>Bartonella henselae</i>          | A244             | LOAG010000001    | 20 | n/a      | <i>Bartonella henselae</i>                 |
| <i>Bartonella henselae</i>          | FR96/BK3         | CP072897         | 20 | n/a      | <i>Bartonella henselae</i>                 |
| <i>Bartonella henselae</i>          | A112             | LOAB010000001    | 20 | n/a      | <i>Bartonella henselae</i>                 |
| <i>Bartonella henselae</i>          | A235             | LOAE010000001    | 20 | n/a      | <i>Bartonella henselae</i>                 |
| <i>Bartonella henselae</i>          | A71              | LOAA010000001    | 20 | n/a      | <i>Bartonella henselae</i>                 |
| <i>Bartonella henselae</i>          | A233             | LOAD010000001    | 20 | n/a      | <i>Bartonella henselae</i>                 |
| <i>Bartonella henselae</i>          | A20              | LNZX010000001    | 20 | n/a      | <i>Bartonella henselae</i>                 |
| <i>Bartonella henselae</i>          | Houston-1        | LRJ020000001     | 20 | n/a      | <i>Bartonella henselae</i>                 |
| <i>Bartonella henselae</i>          | A76              | LNZZ010000001    | 20 | n/a      | <i>Bartonella henselae</i>                 |
| <i>Bartonella henselae</i>          | A74              | LNZY010000001    | 20 | n/a      | <i>Bartonella henselae</i>                 |
| <i>Bartonella henselae</i>          | MVT02            | LN879429         | 20 | n/a      | <i>Bartonella henselae</i>                 |
| <i>Bartonella henselae</i>          | BM1374163        | HG965802         | 20 | n/a      | <i>Bartonella henselae</i>                 |
| <i>Bartonella henselae</i>          | BM1374165        | HG969191         | 20 | n/a      | <i>Bartonella henselae</i>                 |
| <i>Bartonella henselae</i>          | Houston-1        | BX897699         | 20 | n/a      | <i>Bartonella henselae</i>                 |
| <i>Bartonella henselae</i>          | Zeus             | KL411698         | 20 | n/a      | <i>Bartonella henselae</i>                 |
| <i>Bartonella henselae</i>          | JK 53            | KL411717         | 20 | n/a      | <i>Bartonella henselae</i>                 |
| <i>Bartonella henselae</i>          | JK 41            | KI911811         | 20 | n/a      | <i>Bartonella henselae</i>                 |
| <i>Bartonella henselae</i>          | JK 42            | KI911798         | 20 | n/a      | <i>Bartonella henselae</i>                 |
| <i>Bartonella henselae</i>          | JK 50            | KI911793         | 20 | n/a      | <i>Bartonella henselae</i>                 |
| <i>Bartonella henselae</i>          | JK 51            | KI911786         | 20 | n/a      | <i>Bartonella henselae</i>                 |
| <i>Bartonella senegalensis</i>      | OS02             | NZ_HE997540      | 21 | n/a      | <i>Bartonella senegalensis</i>             |
| <i>Bartonella callosciuri</i>       | DSM 28538        | JACHIM010000001  | 22 | n/a      | <i>Bartonella callosciuri</i>              |
| <i>Bartonella phoceensis</i>        | CIP107707        | CADEAD010000001  | 23 | n/a      | <i>Bartonella phoceensis</i>               |
| <i>Bartonella quintana</i>          | CCUG 45777       | CADDYB010000001  | 24 | n/a      | <i>Bartonella quintana</i>                 |
| <i>Bartonella quintana</i>          | NCTC12899        | LS483373         | 24 | n/a      | <i>Bartonella quintana</i>                 |
| <i>Bartonella quintana</i>          | G1712            | CP091505         | 24 | n/a      | <i>Bartonella quintana</i>                 |
| <i>Bartonella quintana</i>          | G1713            | CP091504         | 24 | n/a      | <i>Bartonella quintana</i>                 |
| <i>Bartonella quintana</i>          | KorN             | CP041670         | 24 | n/a      | <i>Bartonella quintana</i>                 |
| <i>Bartonella quintana</i>          | MF1-1            | AP019773         | 24 | n/a      | <i>Bartonella quintana</i>                 |
| <i>Bartonella quintana</i>          | RM-11            | CP003784         | 24 | n/a      | <i>Bartonella quintana</i>                 |
| <i>Bartonella quintana</i>          | Toulouse         | BX897700         | 24 | n/a      | <i>Bartonella quintana</i>                 |
| <i>Bartonella quintana</i>          | JK 68            | KL446932         | 24 | n/a      | <i>Bartonella quintana</i>                 |

|                                              |                   |                 |    |          |                                                |
|----------------------------------------------|-------------------|-----------------|----|----------|------------------------------------------------|
| <i>Bartonella quintana</i>                   | JK 39             | KL446941        | 24 | n/a      | <i>Bartonella quintana</i>                     |
| <i>Bartonella quintana</i>                   | JK 56             | KL446928        | 24 | n/a      | <i>Bartonella quintana</i>                     |
| <i>Bartonella quintana</i>                   | JK 67             | KL446937        | 24 | n/a      | <i>Bartonella quintana</i>                     |
| <i>Bartonella quintana</i>                   | JK 63             | KL411737        | 24 | n/a      | <i>Bartonella quintana</i>                     |
| <i>Bartonella quintana</i>                   | JK 31             | KL411732        | 24 | n/a      | <i>Bartonella quintana</i>                     |
| <i>Bartonella quintana</i>                   | JK 19             | KL411729        | 24 | n/a      | <i>Bartonella quintana</i>                     |
| <i>Bartonella quintana</i>                   | BQ2-D70           | KI911820        | 24 | n/a      | <i>Bartonella quintana</i>                     |
| <i>Bartonella quintana</i>                   | JK 7              | KI911831        | 24 | n/a      | <i>Bartonella quintana</i>                     |
| <i>Bartonella quintana</i>                   | JK 73             | KI911825        | 24 | n/a      | <i>Bartonella quintana</i>                     |
| <i>Bartonella quintana</i>                   | JK 73rel          | KI911823        | 24 | n/a      | <i>Bartonella quintana</i>                     |
| <i>Bartonella quintana</i>                   | JK 12             | KI911828        | 24 | n/a      | <i>Bartonella quintana</i>                     |
| <i>Bartonella washoensis</i>                 | NCTC13399         | UAQI01000043    | 25 | n/a      | <i>Bartonella washoensis</i>                   |
| <i>Bartonella washoensis</i>                 | 085-0475          | JH725101        | 25 | n/a      | <i>Bartonella washoensis</i>                   |
| <i>Bartonella washoensis</i>                 | Sb944nv           | JH725022        | 25 | n/a      | <i>Bartonella washoensis</i>                   |
| <i>Bartonella machadoae</i>                  | 56A               | CP087114        | 26 | n/a      | <i>Bartonella machadoae</i>                    |
| <i>Bartonella harrusi</i> sp. nov.           | 117A              |                 | 27 | n/a      | <i>Bartonella harrusi</i> sp. nov.             |
| <i>Bartonella vinsonii</i> subsp. arupensis  | ATCC 700727       | CADEAE010000001 | 28 | n/a      | <i>Bartonella arupensis</i>                    |
| <i>Bartonella vinsonii</i> subsp. arupensis  | Pm136co           | JH725043        | 28 | n/a      | <i>Bartonella arupensis</i>                    |
| <i>Bartonella vinsonii</i> subsp. arupensis  | OK-94-513         | JH725037        | 28 | n/a      | <i>Bartonella arupensis</i>                    |
| <i>Bartonella vinsonii</i>                   | NCTC12905         | LR134529        | 29 | n/a      | <i>Bartonella vinsonii</i>                     |
| <i>Bartonella vinsonii</i> subsp. vinsonii   | CIP 103738        | CADEAJ010000001 | 29 | n/a      | <i>Bartonella vinsonii</i>                     |
| <i>Bartonella vinsonii</i> subsp. berkhoffii | Winnie            | CP003124        | 30 | n/a      | <i>Bartonella berkhoffii</i>                   |
| <i>Bartonella vinsonii</i> subsp. berkhoffii | ATCC              | JACY010000001   | 30 | n/a      | <i>Bartonella berkhoffii</i>                   |
| <i>Bartonella vinsonii</i> subsp. berkhoffii | Tweed             | KB915630        | 30 | n/a      | <i>Bartonella berkhoffii</i>                   |
| <i>Bartonella vinsonii</i> subsp. berkhoffii | CIP 104960        | CADEAK010000001 | 30 | n/a      | <i>Bartonella berkhoffii</i>                   |
| <i>Bartonella doshiae</i>                    | CCUG 50770        | CACVBH010000001 | 31 | n/a      | <i>Bartonella doshiae</i>                      |
| <i>Bartonella doshiae</i>                    | A14JPB            | CACVBC010000001 | 31 | n/a      | <i>Bartonella doshiae</i>                      |
| <i>Bartonella doshiae</i>                    | BM1374167         | CACVBF010000001 | 31 | n/a      | <i>Bartonella doshiae</i>                      |
| <i>Bartonella doshiae</i>                    | SRS24             | CACVBE010000001 | 31 | n/a      | <i>Bartonella doshiae</i>                      |
| <i>Bartonella doshiae</i>                    | NCTC12862         | UFTF010000002   | 31 | n/a      | <i>Bartonella doshiae</i>                      |
| <i>Bartonella doshiae</i>                    | BM1374167         | CCBL010000001   | 31 | n/a      | <i>Bartonella doshiae</i>                      |
| <i>Bartonella doshiae</i>                    | DSM 102055        | JACHEI010000001 | 31 | n/a      | <i>Bartonella doshiae</i>                      |
| <i>Bartonella doshiae</i>                    | NCTC 12862 = ATCC | JAGY010000001   | 31 | n/a      | <i>Bartonella doshiae</i>                      |
| <i>Bartonella doshiae</i>                    | NCTC 12862        | JH725094        | 31 | n/a      | <i>Bartonella doshiae</i>                      |
| <i>Bartonella birtlesii</i>                  | IBS 325           | CM001557        | 32 | n/a      | <i>Bartonella birtlesii</i>                    |
| <i>Bartonella birtlesii</i>                  | E4                | KE007216        | 32 | n/a      | <i>Bartonella birtlesii</i>                    |
| <i>Bartonella birtlesii</i>                  | E11               | KE007210        | 32 | n/a      | <i>Bartonella birtlesii</i>                    |
| <i>Bartonella birtlesii</i>                  | E7                | KE007202        | 32 | n/a      | <i>Bartonella birtlesii</i>                    |
| <i>Bartonella birtlesii</i>                  | LL-WM9            | JH725076        | 32 | n/a      | <i>Bartonella birtlesii</i>                    |
| <i>Bartonella florencae</i>                  | R4                | HE997451        | 33 | n/a      | <i>Bartonella florencae</i>                    |
| <i>Bartonella alsatica</i>                   | IBS 382T          | CACVBB010000001 | 34 | n/a      | <i>Bartonella alsatica</i>                     |
| <i>Bartonella alsatica</i>                   | CIP 105477        | CP058235        | 34 | n/a      | <i>Bartonella alsatica</i>                     |
| <i>Bartonella alsatica</i>                   | IBS 382           | JH725020        | 34 | n/a      | <i>Bartonella alsatica</i>                     |
| <i>Bartonella</i> sp.                        | B191              | LR736368        | 35 | subsp. 1 | <i>Bartonella</i> sp. nov. lineage 35 subsp. 1 |
| <i>Bartonella</i> sp.                        | DB5-6             | JH725114        | 35 | subsp. 2 | <i>Bartonella</i> sp. nov. lineage 35 subsp. 2 |
| <i>Bartonella taylorii</i>                   | A12JPB            | CADDYH010000001 | 36 | subsp. 1 | <i>Bartonella taylorii</i> subsp. 1            |
| <i>Bartonella taylorii</i>                   | SRS19             | CADDYE010000001 | 36 | subsp. 1 | <i>Bartonella taylorii</i> subsp. 1            |
| <i>Bartonella taylorii</i>                   | 8TBB              | JH725050        | 36 | subsp. 1 | <i>Bartonella taylorii</i> subsp. 1            |
| <i>Bartonella taylorii</i>                   | SRS10             | CADDYG010000001 | 36 | subsp. 2 | <i>Bartonella taylorii</i> subsp. 2            |
| <i>Bartonella taylorii</i>                   | SRS29             | CADEAG010000001 | 36 | subsp. 3 | <i>Bartonella taylorii</i> subsp. 3            |
| <i>Candidatus Bartonella raoultii</i>        | .094              | JAIFRO010000010 | 37 | n/a      | <i>Bartonella raoultii</i> sp. nov.            |
| <i>Bartonella rattaaustraliani</i>           | AUST/NH4          | CALW02000108    | 38 | n/a      | <i>Bartonella rattaaustraliani</i>             |
| <i>Bartonella tamiae</i>                     | Th307             | JH725021        | 39 | n/a      | <i>Bartonella tamiae</i>                       |
| <i>Bartonella tamiae</i>                     | Th239             | JH725147        | 39 | n/a      | <i>Bartonella tamiae</i>                       |
| <i>Bartonella</i> sp.                        | HY038             | CP059725        | 40 | n/a      | <i>Bartonella</i> sp. lineage 40               |
| <i>Bartonella</i> sp.                        | B10834G3          | JACFOM010000009 | 41 | n/a      | <i>Bartonella</i> sp. lineage 41               |
| <i>Bartonella</i> sp.                        | B10834H15         | JACFOL010000031 | 41 | n/a      | <i>Bartonella</i> sp. lineage 41               |
| <i>Bartonella</i> sp.                        | W8125             | JACFRR010000008 | 41 | n/a      | <i>Bartonella</i> sp. lineage 41               |
| <i>Bartonella apis</i>                       | BBC0122           | CP015625        | 41 | n/a      | <i>Bartonella</i> sp. lineage 41               |
| <i>Bartonella</i> sp.                        | B10834G6          | JACFOX010000008 | 42 | subsp. 1 | <i>Bartonella</i> sp. lineage 42 subsp. 1      |
| <i>Bartonella</i> sp.                        | W8099             | JACFSN010000007 | 42 | subsp. 1 | <i>Bartonella</i> sp. lineage 42 subsp. 1      |
| <i>Bartonella apis</i>                       | PEB0122           | LXYU010000009   | 42 | subsp. 2 | <i>Bartonella</i> sp. lineage 42 subsp. 2      |

|                                |               |                 |    |          |                                           |
|--------------------------------|---------------|-----------------|----|----------|-------------------------------------------|
| <i>Bartonella apis</i>         | PEB0150       | LXYS01000009    | 42 | subsp. 2 | <i>Bartonella</i> sp. lineage 42 subsp. 2 |
| <i>Bartonella apis</i>         | PEB0149       | LXYT01000007    | 42 | subsp. 2 | <i>Bartonella</i> sp. lineage 42 subsp. 2 |
| <i>Bartonella</i> sp.          | W8098         | JACFOW010000007 | 42 | subsp. 3 | <i>Bartonella</i> sp. lineage 42 subsp. 3 |
| <i>Bartonella</i> sp.          | W8152         | JACFSP010000008 | 42 | subsp. 3 | <i>Bartonella</i> sp. lineage 42 subsp. 3 |
| <i>Bartonella</i> sp.          | W8151         | JACFSO010000007 | 42 | subsp. 3 | <i>Bartonella</i> sp. lineage 42 subsp. 3 |
| <i>Bartonella</i> sp.          | W8167         | JACFSQ010000017 | 42 | subsp. 3 | <i>Bartonella</i> sp. lineage 42 subsp. 3 |
| <i>Bartonella apis</i>         | BBC0244       | CP015821        | 43 | n/a      | <i>Bartonella apis</i>                    |
| <i>Bartonella</i> sp.          | BBC0178       | CP015820        | 43 | n/a      | <i>Bartonella apis</i>                    |
| <i>Bartonella apis</i>         | M0190         | JACFOS010000003 | 43 | n/a      | <i>Bartonella apis</i>                    |
| <i>Bartonella</i> sp.          | M0187         | JACFOR010000010 | 43 | n/a      | <i>Bartonella apis</i>                    |
| <i>Bartonella</i> sp.          | W8122         | JACFOO010000008 | 43 | n/a      | <i>Bartonella apis</i>                    |
| <i>Bartonella</i> sp.          | W8097         | JACFON010000008 | 43 | n/a      | <i>Bartonella apis</i>                    |
| <i>Bartonella</i> sp.          | P0291         | JACFOQ010000001 | 43 | n/a      | <i>Bartonella apis</i>                    |
| <i>Bartonella</i> sp.          | M0176         | JACFOP010000004 | 43 | n/a      | <i>Bartonella apis</i>                    |
| <i>Bartonella</i> sp.          | M0193         | JACFOV010000087 | 43 | n/a      | <i>Bartonella apis</i>                    |
| <i>Bartonella</i> sp.          | M0192         | JACFOU010000003 | 43 | n/a      | <i>Bartonella apis</i>                    |
| <i>Bartonella</i> sp.          | M0191         | JACFOT010000007 | 43 | n/a      | <i>Bartonella apis</i>                    |
| <i>Bartonella</i> sp.          | M0280         | JACFSJ010000008 | 43 | n/a      | <i>Bartonella apis</i>                    |
| <i>Bartonella</i> sp.          | M0177         | JACFOY010000001 | 44 | n/a      | <i>Bartonella</i> sp. nov. lineage 44     |
| <i>Bartonella</i> sp.          | M0283         | JACFSK010000001 | 45 | n/a      | <i>Bartonella</i> sp. nov. lineage 45     |
| <i>Bartonella</i> sp.          | JB15          | CP019787        | 46 |          | <i>Bartonella</i> sp. nov. lineage 46     |
| <i>Bartonella</i> sp.          | JB63          | CP019788        | 46 |          | <i>Bartonella</i> sp. nov. lineage 46     |
| <i>Bartonella clarridgeiae</i> | 73            | FN645454        | 47 | n/a      | <i>Bartonella clarridgeiae</i>            |
| <i>Bartonella clarridgeiae</i> | ATCC 51734    | JADC01000009    | 47 | n/a      | <i>Bartonella clarridgeiae</i>            |
| <i>Bartonella</i> sp.          | 114           | CP019784        | 48 | subsp. 1 | <i>Bartonella rochalimae</i> subsp. 1     |
| <i>Bartonella</i> sp.          | 11B           | CP019783        | 48 | subsp. 1 | <i>Bartonella rochalimae</i> subsp. 1     |
| <i>Bartonella</i> sp.          | Raccoon60     | CP019786        | 48 | subsp. 1 | <i>Bartonella rochalimae</i> subsp. 1     |
| <i>Bartonella</i> sp.          | CDC_skunk     | CP019782        | 48 | subsp. 1 | <i>Bartonella rochalimae</i> subsp. 1     |
| <i>Bartonella</i> sp.          | A1379B        | CP019780        | 48 | subsp. 1 | <i>Bartonella rochalimae</i> subsp. 1     |
| <i>Bartonella rochalimae</i>   | ATCC BAA-1498 | KL407337        | 48 | subsp. 1 | <i>Bartonella rochalimae</i> subsp. 1     |
| <i>Bartonella</i> sp.          | 1-1C          | CP019489        | 48 | subsp. 2 | <i>Bartonella rochalimae</i> subsp. 2     |
| <i>Bartonella</i> sp.          | Ga0114335_11  | MUYE01000001    | 49 | n/a      | <i>Bartonella</i> sp. nov. lineage 49     |
| <i>Bartonella ancashensis</i>  | 20.00         | CP010401        | 50 | n/a      | <i>Bartonella ancashensis</i>             |
